# Supplementary material for: Reading the Negative: Negative Bias in Interrogation of Information Predicts Prenatal Repetitive Negative Thinking
Source: Research Square preprint supplement (doi:10.21203/rs.3.rs-7397813/v1), 2025-08-28
Supplement: Supplementary file 1 [file 82737db491dd9fc93c17d180.xlsx]

## Sheet: Sheet1
Topic	Valence	Experience	Emotion	Transcript
Perinatal-Relevant	Negative	In-laws criticising parenting	Frustrated	Every visit from my in-laws felt like a performance I couldn't get right. They constantly pointed out what I was doing “wrong”- how I held the baby, what I fed her, even how I spoke to her. I was so frustrated I wanted to scream, but instead I just smiled and counted the minutes until they left.
Perinatal-Relevant	Negative	Friends judging parenting	Hurt	When I opened up to my friends about how hard things were, their responses felt more like subtle jabs than support. They made offhand comments about routines and choices I’d made, like they knew better. I left every conversation feeling more hurt and alone than before.
Perinatal-Relevant	Negative	Baby always crying	Overwhelmed	No matter what I did - feeding, rocking, changing - my baby just wouldn’t stop crying. I felt like I was failing him, and the constant noise chipped away at my ability to think straight. I ended most days completely overwhelmed and unsure how I could make it to the next.
Perinatal-Relevant	Negative	Breastfeeding baby struggles	Disheartened	Breastfeeding was supposed to be natural, but every attempt ended in pain and tears. I tried everything, but nothing seemed to work, and I felt like my body was betraying me. I became increasingly disheartened and started dreading every feeding session.
Perinatal-Relevant	Negative	Parenting decision conflict	Upset	Every conversation about parenting - how to settle the baby at night, when to start solids, whether to follow a schedule - turned into a disagreement. I started bracing for arguments before they began. The constant conflict left me feeling upset, even during moments that should have been joyful.
Perinatal-Relevant	Positive	Supportive parenting partner	Grateful	During the chaos of becoming parents, my partner handled night feeds, soothed our baby, and reminded me I was doing a good job when I felt like I was failing. He stood by me through every exhausting moment. I felt deeply grateful to be parenting alongside someone who understood the weight of it all.
Perinatal-Relevant	Positive	Family helping newborn	Relaxed	When my parents stayed over those first few weeks, they cooked, cleaned, and held the baby while I had time to rest. Their presence filled the house with calm and warmth. With their help, I felt relaxed and able to really enjoy those newborn days together.
Perinatal-Relevant	Positive	Baby’s first steps	Amazed	One moment he was crawling, and the next he was wobbling across the room with the biggest grin on his face. I couldn’t believe how quickly it happened - I was completely caught off guard. Watching my son walk for the first time left me absolutely amazed.
Perinatal-Relevant	Positive	Meeting playgroup mums	Thankful	Joining a playgroup was one of the best decisions I made. The other mums were warm, open, and full of stories that made me feel less alone. I left each meet-up feeling lighter and genuinely thankful for finding people who understood this stage of life.
Perinatal-Relevant	Positive	Hearing baby laugh	Joyful	The first time I heard my baby laugh, it was like sunshine burst into the room. It was so pure and unexpected that I laughed too, tears springing to my eyes. In that moment, I felt completely joyful - like everything hard had been worth it.
Perinatal-Relevant	Negative	Infant waking nightly	Exhausted	My baby was waking up almost every hour at night, and no matter what I did – rocking, feeding – he wouldn’t settle for long. I hadn’t slept properly in a while. I felt run down – my body was heavy, my brain foggy, and the days just blurred together.
Perinatal-Relevant	Negative	Postpartum back pain	Irritable	My back hurt constantly, especially when lifting or feeding the baby. Even simple tasks like bending to change a nappy made me snap at anyone nearby. I felt so irritable all the time, like my body was working against me when I needed it most.
Perinatal-Relevant	Negative	Postpartum body image	Distressed	After giving birth, I barely recognised myself. My clothes didn’t fit, and I felt self-conscious at mum groups and even during skin-to-skin time. I was distressed by how disconnected I felt from my body while trying to bond with my baby.
Perinatal-Relevant	Negative	Postpartum appetite loss	Drained	In the blur of feeding, changing, and soothing my baby, I forgot to eat - or just didn’t feel like it. Meals felt like one more task I didn’t have the energy for. I felt constantly drained, like my body couldn’t keep up with what motherhood demanded of me.
Perinatal-Relevant	Negative	Baby health worries	Anxious	Every tiny cough or change in colour had me searching online or calling the health visitor. I was scared I’d miss something important or make the wrong call. I felt constantly anxious about my baby’s wellbeing, always thinking that something was wrong.
Perinatal-Relevant	Negative	Postpartum mood swings	Overwhelmed	Some days I was laughing with my baby, and hours later I was crying alone in the bathroom. I couldn’t predict how I’d feel from one moment to the next. I felt so overwhelmed by how emotionally out of control motherhood made me feel.
Perinatal-Relevant	Positive	Empowered by motherhood	Strong	Becoming a mum made me realise just how capable I am. I started setting goals, even small ones, and felt a real drive to grow - for myself and for my baby. I felt strong in a way I hadn’t before, like motherhood had unlocked something powerful in me.
Perinatal-Relevant	Positive	Cuddles with baby	Fulfilled	Every time I held her close and felt her tiny body relax against mine, it lifted something heavy from my chest. Those quiet cuddle moments made everything feel lighter and more meaningful. I felt truly fulfilled, like love was pouring into me just from being near my baby.
Perinatal-Relevant	Positive	Parenting deepening emotions	Moved	I didn’t expect motherhood to change how deeply I felt things, but it changed me in quiet, lasting ways. The smallest moments - rocking him to sleep, feeling his tiny hand in mine - touched me more than I thought they would. I felt moved every day, like something in me had softened and grown with him.
Perinatal-Relevant	Positive	Outdoors with baby	Calm	Getting out for walks with my baby changed everything. The fresh air, the movement, the quiet - it gave me a clear head and a sense of peace. I felt calm each time, and I came back home with more energy for both of us.
Perinatal-Relevant	Positive	Active baby playtime	Content	Rolling on the floor, making silly faces, playing peekaboo - it became the best part of my day. Seeing him giggle while we played made everything else fade into the background. I felt content in those moments, like I was exactly where I was meant to be.
Perinatal-Relevant	Positive	Exercise after childbirth	Motivated	Starting gentle workouts again gave me a sense of momentum. It wasn’t about "getting my body back" - it was about feeling strong enough to care for my baby and keep up with everything motherhood brought. I felt motivated to keep going, knowing each bit of movement helped me feel more capable as a mum.
Perinatal-Relevant	Negative	Parenting career pause	Stressed	Taking time off from my career to care for my baby left me feeling disconnected from my professional goals. Every time I thought about going back to work, it felt like I was starting from scratch, behind everyone else. I became stressed, unsure if I’d ever feel catch up or regain that sense of purpose or ambition.
Perinatal-Relevant	Negative	Difficulties arranging childcare	Nervous	Finding reliable childcare for my baby seemed impossible - every option either didn’t feel right or was way too expensive. The constant worry about whether my baby would be well cared for made me anxious. I was nervous that no matter what, something would fall through and I’d be left scrambling.
Perinatal-Relevant	Negative	Baby straining budget	Worried	Between nappies, formula, and baby clothes, the expenses were adding up faster than I could manage. I felt a constant knot in my stomach, wondering if we’d be able to afford everything. I was worried about our financial stability, especially as my income was less than it had been before the baby.
Perinatal-Relevant	Negative	Maternity leave return	Overwhelmed	Returning to work after maternity leave felt like jumping straight into the deep end. I had so much to catch up on, and trying to balance my new responsibilities at home made it all feel impossible. I was overwhelmed, juggling everything at once and unsure how I’d manage it all.
Perinatal-Relevant	Negative	Baby interrupting work	Frustrated	Every time I tried to get into work, the baby would need something - feeding, changing, or just attention. I couldn’t focus or get anything done in a timely manner, and it left me feeling frustrated. I wanted to do well at work, but it felt like my baby was always standing in the way.
Perinatal-Relevant	Positive	Paid leave postpartum	Valued	Having paid leave meant I could focus fully on bonding with my baby without constant financial worry. I felt like my time as a new mother was genuinely respected. It made me feel valued - not just as an employee, but as a person stepping into motherhood.
Perinatal-Relevant	Positive	Boss supportive postpartum	Reassured	When I returned to work, my boss checked in regularly and reminded me that my pace was okay. Her understanding gave me space to adjust without pressure. I felt reassured knowing I didn’t have to prove anything - just ease back in while still being a mum.
Perinatal-Relevant	Positive	Workplace encouraging mother	Confident	My team celebrated my return from maternity leave and made it clear they believed in me. Instead of being treated like I’d fallen behind, I was encouraged to grow. That support made me feel confident stepping back into my role as both a mother and a professional.
Perinatal-Relevant	Positive	Financial stability postpartum	Secure	We’d planned ahead, and having steady income and savings made a huge difference once the baby arrived. I could focus on my little one without panicking about bills or essentials. I felt secure knowing we were on solid ground financially during such a big life shift.
Perinatal-Relevant	Positive	Parental leave support	Grateful	From forms to planning handovers, my workplace handled everything with care. I didn’t feel like an inconvenience - they made space for this part of my life. I felt truly grateful for the way they supported my parental leave from beginning to end.
Perinatal-Irrelevant	Negative	In-laws cancelled last-minute	Frustrated	I’d spent all day preparing for dinner with my in-laws, only for them to cancel an hour before they were supposed to arrive. I was frustrated - not just because of the wasted time, but because it felt like they didn’t care. I felt like my effort was totally unappreciated by them.
Perinatal-Irrelevant	Negative	Friends mocked hobbies	Hurt	I tried to share one of my hobbies with my friends, hoping they’d appreciate it, but instead, they laughed and made jokes. I felt hurt, like my interests didn’t matter to them. It stung to realise that the people I cared about didn’t take me seriously.
Perinatal-Irrelevant	Negative	Roommate disruptive music	Overwhelmed	My roommate played music loudly all day, and I couldn’t focus on anything. I asked her to keep it down, but it didn’t seem to matter. I felt overwhelmed, with no space to concentrate, and she just didn’t care about my needs.
Perinatal-Irrelevant	Negative	Partner missed dinner	Disheartened	I cooked a special dinner for my partner, hoping we could spend some quality time together, but he never showed up. When I found out he’d forgotten, I felt completely disheartened. I had tried so hard to make the evening special, and it felt like he didn’t value our relationship enough to even remember.
Perinatal-Irrelevant	Negative	Hairdresser ruined hair	Upset	I trusted the hairdresser with a simple trim, but instead, she cut it too short and uneven. I tried to voice my concerns, but she dismissed them, saying it would "grow out." I felt upset, not just about the hair, but about how she didn’t seem to care about my preferences or how I felt.
Perinatal-Irrelevant	Positive	Friends game night	Grateful	When my friends invited me to a game night, I felt so grateful to spend the evening with them. We laughed, played, and just enjoyed each other’s company without any pressure. It was such a simple yet perfect night, and I felt at peace and truly happy.
Perinatal-Irrelevant	Positive	Family hosted lunch	Relaxed	When my family hosted lunch, it felt like a perfect day. Everyone pitched in, and the atmosphere was so peaceful and warm. I felt completely relaxed, surrounded by loved ones, enjoying delicious food and great conversation without a single worry.
Perinatal-Irrelevant	Positive	Partner planned trip	Amazed	When my partner surprised me with a trip, I was amazed by the thoughtfulness behind it. He had planned everything down to the smallest detail, knowing exactly what I’d love. It was such a thoughtful gesture that made me feel incredibly special and valued in our relationship.
Perinatal-Irrelevant	Positive	Barbecue with neighbours	Thankful	Our neighbours invited us to a barbecue, and it turned out to be a perfect evening. The food was amazing, and the atmosphere was so welcoming. I felt thankful for their kindness and for the opportunity to connect with people who made me feel so comfortable in our new community.
Perinatal-Irrelevant	Positive	Friend reached out	Joyful	When my friend reached out just to chat, it made me feel so joyful. It had been a while since we caught up, and her message lifted my spirits immediately. I was so happy to hear from her and reminded of how strong our friendship is.
Perinatal-Irrelevant	Negative	Travel jet lag	Exhausted	After travelling, I could barely keep my eyes open from the jet lag. I felt completely exhausted, unable to get back into any kind of routine. My body felt drained, and no amount of sleep seemed to help; I just couldn't shake the fatigue
Perinatal-Irrelevant	Negative	Studying for exam	Irritable	I couldn’t focus on studying for the exam no matter how hard I tried. The pressure to remember everything I had learned was making me irritable, and I felt like I might forget something important. I couldn't shake the feeling of frustration as the exam drew nearer.
Perinatal-Irrelevant	Negative	Dental surgery swelling	Distressed	After my dental surgery, the swelling in my face was worse than I’d expected. It hurt to chew or even speak, and the whole situation just felt overwhelming. I was so distressed by the discomfort and how long it seemed to take to heal.
Perinatal-Irrelevant	Negative	Upcoming deadline insomnia	Drained	I couldn’t sleep at all the night before my deadline, my mind racing with worries about finishing everything. The lack of rest left me drained and unable to function the next day, and I felt stuck in a cycle of exhaustion and stress. I knew I had to get everything done, but I just couldn’t focus.
Perinatal-Irrelevant	Negative	Shaking before speech	Anxious	The moment before I stepped up to give my speech, I could feel my hands shaking uncontrollably. My heart was racing, and all I could think about was how nervous I was. I felt completely anxious, and it seemed impossible to calm myself down.
Perinatal-Irrelevant	Negative	Panic during concert	Overwhelmed	As the crowd got louder at the concert, I started to feel a sense of panic creeping in. The noise, the people, everything felt too much, and I couldn’t escape it. I was completely overwhelmed, trying to control my breathing and make it through without breaking down.
Perinatal-Irrelevant	Positive	Hiking improved stamina	Strong	As I hiked up the trail, I noticed how much stronger my stamina had become. The higher I climbed, the more I realised how far I had come in my fitness journey. I felt powerful and strong, knowing that my body was capable of so much more than I had initially thought.
Perinatal-Irrelevant	Positive	Finished painting artwork	Fulfilled	Completing my painting was such a satisfying experience. After hours of work, seeing the final piece come together was incredibly fulfilling. I felt proud of the effort I put in, and the sense of accomplishment was truly rewarding.
Perinatal-Irrelevant	Positive	Yoga deep breathing	Moved	After a long, hectic day, I took a moment to focus on my breathing during yoga. The deep breaths made me feel moved in a way I hadn’t in a while. It felt like the stress just melted away, and I was able to relax and clear my mind.
Perinatal-Irrelevant	Positive	Relaxed after deadline	Calm	After submitting my project before the deadline, I finally took a moment to relax. The weight of the pressure was lifted, and I felt calm for the first time in weeks. It was such a relief to know that I had managed everything and could now enjoy the peace of finishing on time.
Perinatal-Irrelevant	Positive	Achieved fitness goal	Content	Reaching my fitness goal was one of the most rewarding moments. All the hard work, the early mornings, and the sacrifices paid off, and I felt so content. It was such a boost to see the results and know that I had pushed myself to achieve something meaningful.
Perinatal-Irrelevant	Positive	Meditated before workday	Motivated	I took a few minutes to meditate before starting my workday, and it made all the difference. I felt motivated and focused as I approached my tasks, more present and mindful. The calmness from the meditation carried me through the day, helping me stay grounded even during stressful moments.
Perinatal-Irrelevant	Negative	Work contract loss	Stressed	When I found out my work contract wouldn’t be renewed, it made me feel really stressed. I had bills to pay and no backup plan in place. The uncertainty about what came next made it hard to focus on anything else.
Perinatal-Irrelevant	Negative	Piling tasks deadline	Nervous	As the deadline approached, my to-do list kept growing, and I couldn’t keep up. The pressure made me increasingly nervous - I was scared I’d miss something important. I felt like I was barely holding it together.
Perinatal-Irrelevant	Negative	Relocation career pause	Worried	Relocating for my partner’s job meant stepping away from mine, and I didn’t realise how much it would affect me. I went from feeling driven and capable to feeling invisible and left behind. Watching my peers advance while I stayed still left me deeply worried, like my ambitions had been placed on indefinite hold.
Perinatal-Irrelevant	Negative	Overbooked meeting schedule	Overwhelmed	My calendar was packed with back-to-back meetings, and I barely had time to breathe. I felt completely overwhelmed, constantly rushing from one thing to the next without time to actually do my work. It left me drained and unfocused.
Perinatal-Irrelevant	Negative	Career not progressing	Frustrated	No matter how hard I worked, I couldn’t seem to move forward in my career. Others were being promoted or recognised, and I was still in the same place. It left me feeling frustrated, angry at the lack of progress.
Perinatal-Irrelevant	Positive	Project success recognition	Valued	After weeks of hard work, my team celebrated the project’s success - and I was recognised for my contributions. It felt amazing to know my efforts had paid off. I felt truly valued, knowing that my work and presence mattered to the team.
Perinatal-Irrelevant	Positive	Supportive career leadership	Reassured	My manager regularly checked in and encouraged my development, and that support meant everything. Knowing leadership believed in me reassured me that I was on the right path. It made me feel safe to grow and take on new challenges.
Perinatal-Irrelevant	Positive	Work project approval	Confident	When my project was approved, it boosted my confidence instantly. I had poured so much into the idea and hearing it would move forward made me feel capable and trusted. It was a big moment of professional affirmation.
Perinatal-Irrelevant	Positive	Income boost earned	Secure	When I received an income boost, I felt secure in my role at work. The recognition and reward made me confident in my abilities and contributions. It was a great feeling, knowing that my efforts were valued and that I had a stable place in the company.
Perinatal-Irrelevant	Positive	Study schedule flexibility	Grateful	Being able to adjust my schedule while studying made all the difference. My supervisor’s flexibility allowed me to manage both work and study without burning out. I felt incredibly grateful to be in a workplace that respected my goals.
